# Supplementary material
Source: ML conference proceedings conference paper supplement (https://openaccess.thecvf.com/content/CVPR2026/html/He_VIRAL_Visual_Sim-to-Real_CVPR_2026_paper.html)
Supplement: Supplementary file 1 [file He_VIRAL_Visual_Sim-to-Real_CVPR_2026_supplemental.pdf]

# VIRAL: Visual Sim-to-Real at Scale for Humanoid Loco-Manipulation

## Supplementary Material

### 7. Training Details

#### 7.1. Observation Details

Table 1 summarizes the observation terms and their corresponding dimensions.

| State term                         | Dimensions |
|------------------------------------|------------|
| Base linear velocity               | 3          |
| Base angular velocity              | 3          |
| Projected gravity                  | 3          |
| Actions                            | 31         |
| Stage                              | 5          |
| Delta actions                      | 11         |
| DoF position                       | 43         |
| DoF velocity                       | 43         |
| Placement position                 | 2          |
| Table–pelvis transform             | 9          |
| Finger-tip forces for hold_object  | 12         |
| Hold_object transform              | 9          |
| Hold_object–hand transform         | 9          |
| Target pre-place position          | 3          |
| Finger-tip forces for grasp_object | 12         |
| Grasp_object transform             | 9          |
| Grasp_object–hand transform        | 9          |
| Target lift position               | 3          |
| HOMIE commands                     | 7          |
| Single-step total dim              | 226        |

Table 1. Observation dimensions for `teacher`.

Table 2 lists the observation terms and their corresponding dimensions. In addition to these state observations, we feed an RGB image of size  $108 \times 192$  into the vision encoder. The resulting 128-dimensional visual feature is concatenated with the state observations and then passed to the policy head.

| State term                 | Dimensions |
|----------------------------|------------|
| Base angular velocity      | 3          |
| Projected gravity          | 3          |
| Actions                    | 31         |
| DoF position (w/o fingers) | 29         |
| DoF velocity (w/o fingers) | 29         |
| Delta actions              | 11         |
| HOMIE commands             | 7          |
| Single-step total dim      | 113        |

Table 2. Observation dimensions for `student`.

#### 7.2. Reward Details

A single place–pickup cycle is decomposed into five stages: (1) walking toward the object; (2) moving the arm and hand to a pre-place pose; (3) placing the object; (4) grasping and lifting the next object; and (5) turning. Repeating this sequence produces a long-horizon loco-manipulation loop. At each step, the total reward is a stage-weighted sum

$$r_t = \sum_{i=0}^4 w_i \mathbb{1}[s_t = i] r_t^{(i)}, \quad w_i > 0,$$

and stage transitions are governed by stage-specific advancement and completion criteria. Table 3 instantiates  $r^{(s)}$  with stage-dependent shaping terms for teacher policy.

#### 7.3. Hyperparameters Details

Table 4 lists the PD gains used for the Unitree G1 robot equipped with 3-finger dexterous hands.

Table 5 lists the hyperparameters for teacher policy trained by PPO [59].

Table 6 lists the hyperparameters for student policy trained by the mixture of DAgger [56] and Behavior Cloning.

#### 7.4. Domain Randomization

Table 7 summarizes all randomizations used during policy training, including image quality, dome lighting, materials, table properties, and camera extrinsics.

| Term                                                    | Expression                                                                                                                     | Weight                | Stage(s) |
|---------------------------------------------------------|--------------------------------------------------------------------------------------------------------------------------------|-----------------------|----------|
| <b>Termination / generic penalties</b>                  |                                                                                                                                |                       |          |
| Termination                                             | $\mathbb{1}_{\{\text{termination}\}}$                                                                                          | -2000.0               | 0-4      |
| Delta action rate                                       | $\ \Delta a_t\ _2^2$                                                                                                           | -0.01                 | 0-4      |
| DoF velocity                                            | $\ \dot{\mathbf{q}}\ _2^2$                                                                                                     | -0.5                  | 0-4      |
| DoF acceleration                                        | $\ \ddot{\mathbf{q}}\ _2^2$                                                                                                    | $-3.0 \times 10^{-6}$ | 0-4      |
| Torque limits                                           | $\ \boldsymbol{\tau}\ _2^2$                                                                                                    | -0.001                | 0-4      |
| Output smoothness                                       | $\ \pi_t - \pi_{t-1}\ _2^2$                                                                                                    | -9.0                  | 0-4      |
| Finger primitive limits                                 | $ \text{clip}(u_{\text{finger}}, [l, u]) - u_{\text{finger}} $                                                                 | -20.0                 | 0-4      |
| Fast right-arm velocity                                 | $\ \mathbf{q}_{\text{right arm}}\ _2^2$                                                                                        | -80.0                 | 0-4      |
| Finger qvel, when contacting ground with single-foot    | $\ \dot{\mathbf{q}}_{\text{finger}}\ _2 \mathbb{1}_{\text{single-foot}}$                                                       | -3000.0               | 1-3      |
| Arm qvel, when contacting ground with single-foot       | $\ \dot{\mathbf{q}}_{\text{right arm}}\ _2 \mathbb{1}_{\text{single-foot}}$                                                    | -1300.0               | 1-3      |
| <b>Heading / command shaping</b>                        |                                                                                                                                |                       |          |
| Heading toward object                                   | $((\psi_{\text{GraspObj}} - \psi_{\text{robot}})/\pi)^2$                                                                       | -10000.0              | 0        |
| Object in view                                          | $\mathbb{1}[y_{\text{right hand}} > y_{\text{GraspObj}} - 0.1] + \mathbb{1}[y_{\text{left hand}} < y_{\text{GraspObj}} + 0.1]$ | -1.0                  | 0        |
| Large linear $v_x$ command                              | $\sum \max(0,  v_x^{\text{cmd}}  - 0.5)$                                                                                       | -20.0                 | 0-4      |
| Large linear $v_y$ command                              | $\sum \max(0,  v_y^{\text{cmd}}  - 0.5)$                                                                                       | -20.0                 | 0-4      |
| Large angular $\omega$ command                          | $\sum \max(0,  \omega^{\text{cmd}}  - 0.5)$                                                                                    | -20.0                 | 0-4      |
| Large upper-body actions                                | $\sum \max(0,  u_{\text{upper}}  - 2\pi)$                                                                                      | -20.0                 | 0-4      |
| Zero linear $v_x$ , linear $v_y$ , angular $\omega$ cmd | $ v_x^{\text{cmd}}  +  v_y^{\text{cmd}}  +  \omega^{\text{cmd}} $                                                              | -12.0                 | 1-3      |
| Zero linear $v_x$ , linear $v_y$ cmd                    | $ v_x^{\text{cmd}}  +  v_y^{\text{cmd}} $                                                                                      | -4.0                  | 4        |
| <b>Task / object-centric rewards</b>                    |                                                                                                                                |                       |          |
| Robot-Object distance                                   | $\exp(-4(\ p_{\text{robot}} - p_{\text{GraspObj}}\  - 0.45)^2)$                                                                | 2.0                   | 0-4      |
| Upper-body actions (pose)                               | $\ \mathbf{q}_{\text{right arm}}\ _2^2$                                                                                        | -1.0                  | 0        |
| Keep hand closed                                        | $\exp(-4(u_{\text{finger}} - u_{\text{close}})^2)$                                                                             | 9.0                   | 0-1, 3-4 |
| Place objects when near tray                            | $-\ \mathbf{f}_{\text{placeObj}}\  * \mathbb{1}(\ p_{\text{placeObj}} - p_{\text{tray}}\  < 0.3)$                              | 10.0                  | 0-1      |
| Holding object                                          | $\exp(-4\ p_{\text{placeObj}} - p_{\text{hand}}\ _2)$                                                                          | 1.0                   | 0-4      |
| Hand-object distance                                    | $\exp(-10 \max_k \ p_{\text{finger}}^{(k)} - p_{\text{GraspObj}}\ _2)$                                                         | 20.0                  | 3-4      |
| Grasp based on obj-finger dir                           | $-\hat{\mathbf{d}}_{\text{thumb}}^\top \hat{\mathbf{d}}_{\text{index}}$                                                        | 5.0                   | 3-4      |
| Grasp force                                             | $\sum \ \mathbf{f}_{\text{GraspObj-hand}}\ $                                                                                   | 1.0                   | 3-4      |
| Lift goal distance                                      | $\exp(-10\ p_{\text{GraspObj}} - p_{\text{goal}}\ ^2)$                                                                         | 10.0                  | 3-4      |
| Lift $z$                                                | $\min(h_{\text{GraspObj}} - h_{\text{table}}, 0.15)$                                                                           | 200.0                 | 3-4      |
| Turn around                                             | $- y_{\text{robot}} - y_{\text{desired}} $                                                                                     | 15.0                  | 4        |
| Right-arm qpos tracking (hold)                          | $\exp(-4\ \mathbf{q}_{\text{right arm}} - \mathbf{q}_{\text{place}}^*\ _2)$                                                    | 5.0                   | 0-2      |
| Right-arm qpos tracking (front)                         | $\exp(-4\ \mathbf{q}_{\text{right arm}} - \mathbf{q}_{\text{Grasp}}^*\ _2)$                                                    | 25.0                  | 3-4      |
| Finger qvel during right-arm qvel                       | $\exp(-6\ \dot{\mathbf{q}}_{\text{arm}}\ _2 \ \dot{\mathbf{q}}_{\text{finger}}\ _2)$                                           | 15.0                  | 1-4      |
| Object-table contact move                               | $\ \mathbf{v}_{\text{GraspObj},xy}\  \mathbb{1}_{\text{table-contact}}$                                                        | -1000.0               | 1-4      |
| Object relative move (hand-obj $v_z$ )                  | $ v_{\text{GraspObj}}^z - v_{\text{hand}}^z  \mathbb{1}_{\text{in-grasp}}$                                                     | -3000.0               | 1-3      |
| Object lean during pick                                 | $ \phi_{\text{GraspObj}}  +  \theta_{\text{GraspObj}} $                                                                        | -500.0                | 0-3      |
| Object non- $z$ velocity during pick                    | $\ \mathbf{v}_{\text{GraspObj},xy}\ _2$                                                                                        | -500.0                | 0-3      |

Table 3. Reward components, expressions, weights, and the stages (0-4) where each term is applied.

| Joint          | $K_p$ [N·m/rad] | $K_d$ [N·m·s/rad] |
|----------------|-----------------|-------------------|
| hip_yaw        | 150             | 2.0               |
| hip_roll       | 150             | 2.0               |
| hip_pitch      | 150             | 2.0               |
| knee           | 200             | 4.0               |
| ankle_pitch    | 40              | 2.0               |
| ankle_roll     | 40              | 2.0               |
| waist_yaw      | 250             | 5.0               |
| waist_roll     | 250             | 5.0               |
| waist_pitch    | 250             | 5.0               |
| shoulder_pitch | 100             | 5.0               |
| shoulder_roll  | 100             | 5.0               |
| shoulder_yaw   | 40              | 2.0               |
| elbow          | 40              | 2.0               |
| wrist_roll     | 20              | 2.0               |
| wrist_pitch    | 20              | 2.0               |
| wrist_yaw      | 20              | 2.0               |
| hand_index     | 0.5             | 0.1               |
| hand_middle    | 0.5             | 0.1               |
| hand_thumb_1   | 0.5             | 0.1               |
| hand_thumb_2   | 0.5             | 0.1               |
| hand_thumb_0   | 2.0             | 0.1               |

Table 4. Joint-space PD gains ( $K_p$ ,  $K_d$ ) used in the low-level controller.

| Hyperparameters              | Values                    |
|------------------------------|---------------------------|
| Number of environments       | 32768 (2048*8GPUs*2Nodes) |
| Discount factor ( $\gamma$ ) | 0.998                     |
| Learning rate                | 0.00002                   |
| Entropy coefficient          | 0.01                      |
| Value loss coefficient       | 1                         |
| Init noise std (RL)          | 0.5                       |
| MLP size                     | [512, 256, 128]           |

Table 5. Hyperparameters for teacher policy.

| Hyperparameters                 | Values                    |
|---------------------------------|---------------------------|
| Number of environments          | 65535 (1024*8GPUs*8Nodes) |
| Number of steps per environment | 1                         |
| Learning rate                   | 0.0002                    |

Table 6. Hyperparameters for student policy.

Table 7. Comprehensive domain randomization parameters during training

| Parameter                        | Probability | Distribution                                                                                                         |
|----------------------------------|-------------|----------------------------------------------------------------------------------------------------------------------|
| <b>Image Augmentation</b>        |             |                                                                                                                      |
| Brightness                       | 0.25        | $\sim \mathcal{U}(0.7, 2)$                                                                                           |
| Contrast                         | 0.25        | $\sim \mathcal{U}(0.5, 1.5)$                                                                                         |
| Hue                              | 0.5         | $\sim \mathcal{U}(-0.1, 0.1)$                                                                                        |
| Saturation                       | 0.25        | $\sim \mathcal{U}(0.5, 2)$                                                                                           |
| Gaussian Noise Std               | 0.25        | $\sim \mathcal{U}(0.0, 0.15)$                                                                                        |
| Gaussian Blur Kernel Size        | 0.25        | $\sim \mathcal{U}(3, 5)$                                                                                             |
| Gaussian Blur Sigma              | 0.25        | $\sim \mathcal{U}(0.1, 1.5)$                                                                                         |
| <b>Lighting</b>                  |             |                                                                                                                      |
| Dome Light Intensity             | 1.0         | $\sim \mathcal{U}(800, 2000)$                                                                                        |
| Dome Light Yaw Rotation          | 1.0         | $\sim \mathcal{U}(-\pi, \pi)$                                                                                        |
| Dome Light Texture Map           | 1.0         | $\sim \mathcal{U}(\text{texture\_maps})$<br>(Indoor, Clear, Cloudy, Night, Studio)                                   |
| <b>Material Randomization</b>    |             |                                                                                                                      |
| Robot Material - Roughness       | 1.0         | $\sim \mathcal{U}(0.0, 0.8)$                                                                                         |
| Robot Material - Metallic        | 1.0         | $\sim \mathcal{U}(0.0, 0.8)$                                                                                         |
| Robot Material - Specular        | 1.0         | $\sim \mathcal{U}(0.0, 0.8)$                                                                                         |
| Floor Material Texture           | 1.0         | $\sim \mathcal{U}(\text{texture\_maps})$<br>(Wood, Carpet, Masonry, Metals,<br>Natural, Plastics, Stone, Wall Board) |
| Table Material Texture           | 1.0         | $\sim \mathcal{U}(\text{texture\_maps})$<br>(Wood)                                                                   |
| Object Material Texture          | 1.0         | $\sim \mathcal{U}(\text{texture\_maps})$<br>(All Base Materials)                                                     |
| <b>Table Physical Properties</b> |             |                                                                                                                      |
| Table Height (m)                 | 1.0         | $\sim \mathcal{U}(0.65, 0.6775)$                                                                                     |
| Table Depth (m)                  | 1.0         | $\sim \mathcal{U}(0.7, 0.75)$                                                                                        |
| Table Width (m)                  | 1.0         | $\sim \mathcal{U}(1.4, 1.6)$                                                                                         |
| Table Thickness (m)              | 1.0         | $\sim \mathcal{U}(0.035, 0.04)$                                                                                      |
| <b>Camera Extrinsic</b>          |             |                                                                                                                      |
| Position Noise - X (m)           | 1.0         | $\sim \mathcal{U}(-0.02, 0.02)$                                                                                      |
| Position Noise - Y (m)           | 1.0         | $\sim \mathcal{U}(-0.05, 0.05)$                                                                                      |
| Position Noise - Z (m)           | 1.0         | $\sim \mathcal{U}(-0.02, 0.02)$                                                                                      |
| Rotation Noise - Roll (rad)      | 1.0         | $\sim \mathcal{U}(-0.05, 0.05)$                                                                                      |
| Rotation Noise - Pitch (rad)     | 1.0         | $\sim \mathcal{U}(-0.1, 0.1)$                                                                                        |
| Rotation Noise - Yaw (rad)       | 1.0         | $\sim \mathcal{U}(-0.05, 0.05)$                                                                                      |
